# Supplementary material for: Intestinal Gpr17 deficiency improves glucose metabolism by promoting GLP-1 secretion
Source: PubMed Central journal article supplement — Cell Rep. Author manuscript; Available in PMC 2022 Apr 1. (PMC8972502; doi:10.1016/j.celrep.2021.110179), 2022-01-04
Supplement: NIHMS1768919-supplement-1.pdf [file NIHMS1768919-supplement-1.pdf]

**Cell Reports, Volume 38**

**Supplemental information**

**Intestinal Gpr17 deficiency improves glucose  
metabolism by promoting GLP-1 secretion**

**Shijun Yan, Jason M. Conley, Austin M. Reilly, Natalie D. Stull, Surabhi D. Abhyankar, Aaron C. Ericsson, Tatsuyoshi Kono, Andrei I. Molosh, Chandrashekhar A. Kubal, Carmella Evans-Molina, and Hongxia Ren**

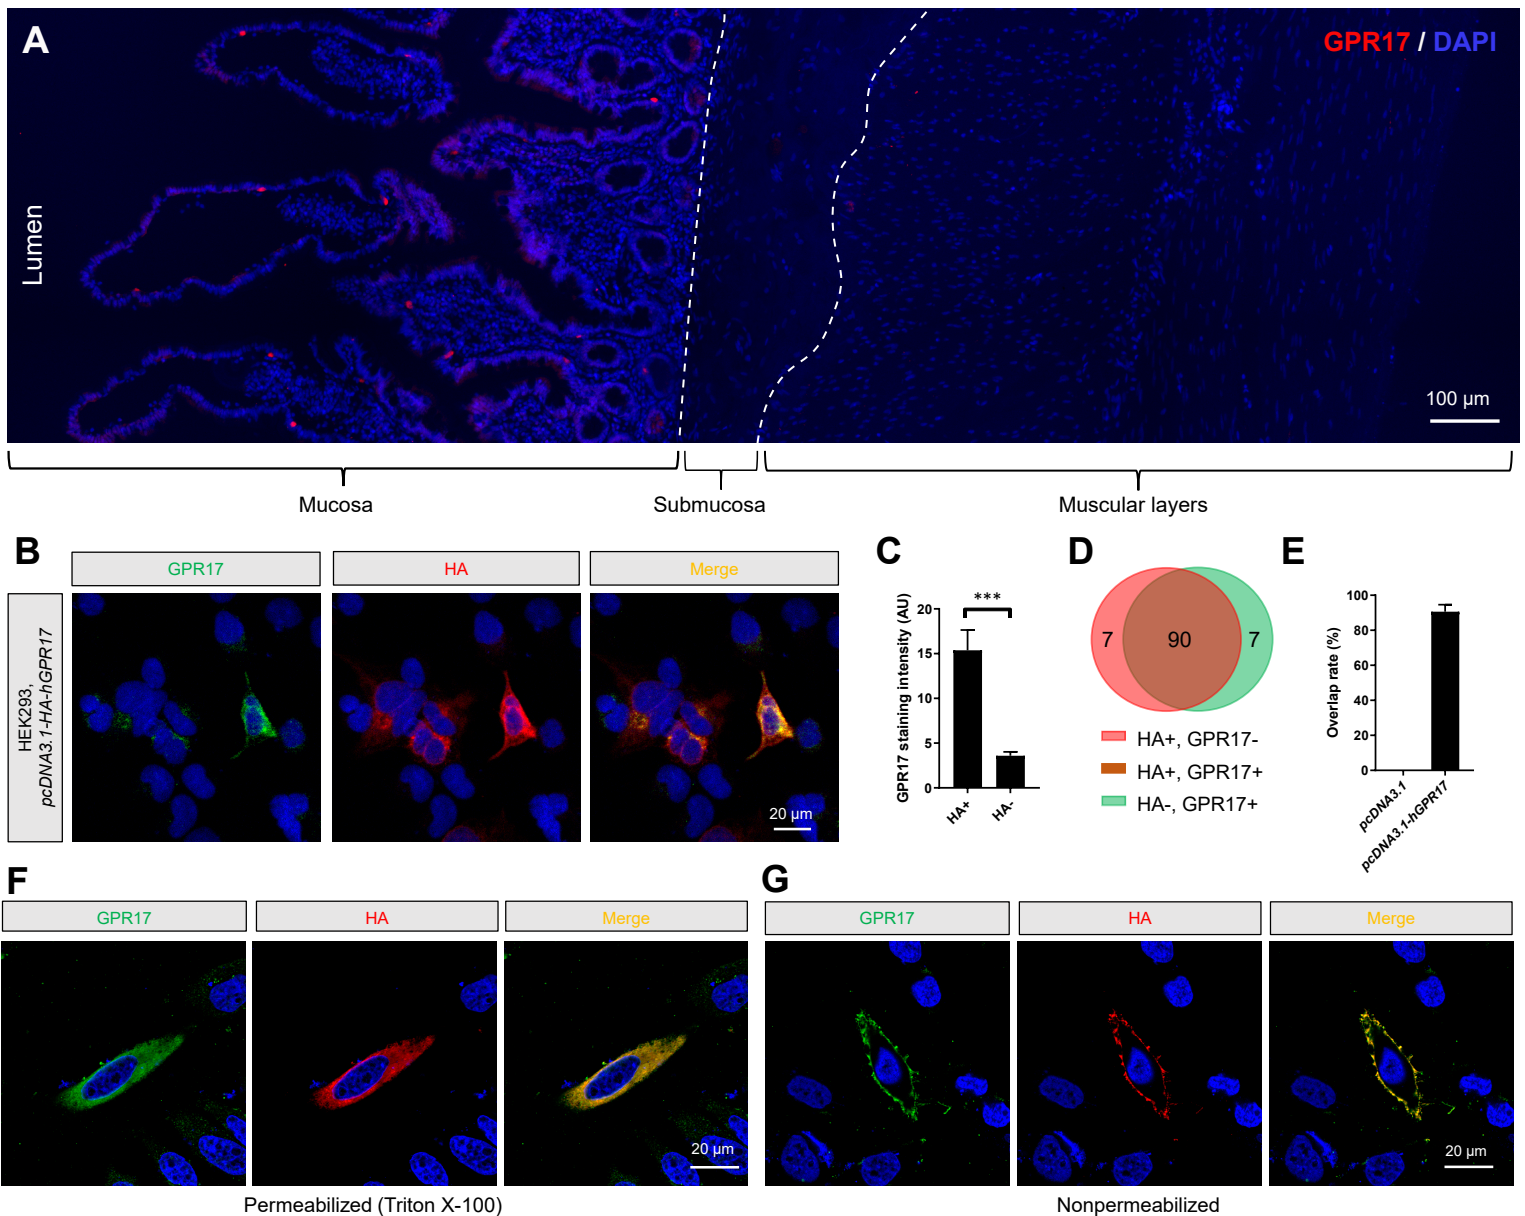

**Supplemental Figure S1. Validation of GPR17 antibody specificity and tissue distribution of Gpr17 in mice. Related to Figure 1. A.** Immunohistochemistry staining of GPR17 in human small intestine. GPR17 was detected in mucosal epithelium layer but not in submucosa or muscular layers. **B.** Co-immunostaining of GPR17 and HA in HEK293 cells transiently transfected with pcDNA3.1-HA-hGPR17. **C.** Gpr17 staining intensity in HA+ and HA- cells (n=10 image fields). **D.** Venn diagram depicting the counts of single-stained or double-stained cells. **E.** Overlap rate showing percentage of double-stained cells in all HA+ cells (n=10 image fields). **F-G.** Representative images of total (**F**) or cell-surface (**G**) staining of GPR17 and HA in HeLa cells transiently transfected with pcDNA3-HA-hGPR17. Cells were permeabilized by 0.1% Triton X-100 for total GPR17 staining or nonpermeabilized for cell-surface GPR17 staining. Unpaired two-tailed Student's t-test, \*\*\* $p < 0.001$ . Data are displayed as means  $\pm$  SEM.

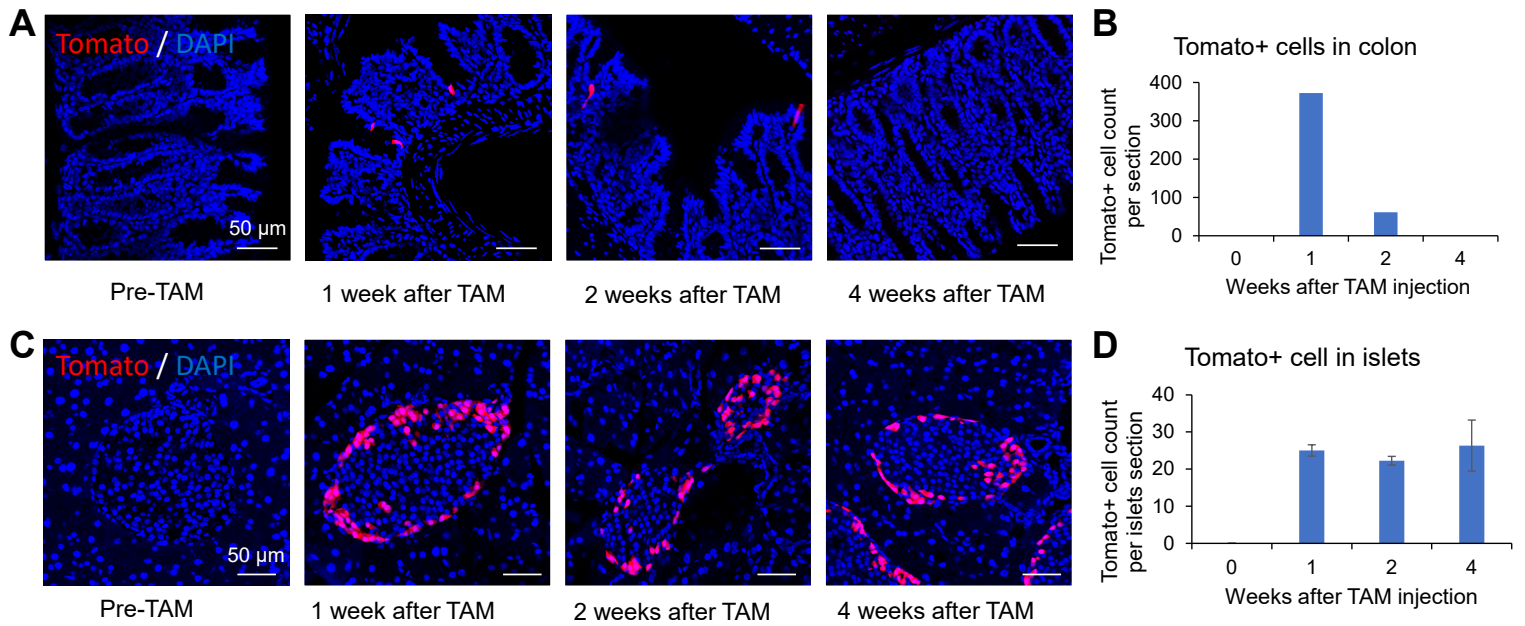

**Supplemental Figure S2. Cre recombinase was activated by tamoxifen in both islets and gut of *Rosa-tdTomato;Gcg-CreERT* mice. Related to Figure 3. A-B.** *Gcg* expressing cells in gut were labeled by red fluorescence (tdTomato) after tamoxifen-induced Cre recombinase activation. The hit targeting gut was temporary due to the fast-refreshing rate of gut epithelium. Cells were counted in “swiss roll” sections of the whole colon (n=1 mouse). C-D. *Gcg* expressing cells of islets were labeled by red fluorescence (tdTomato) after tamoxifen-induced Cre recombinase activation. The hit targeting islets was sustained during the observance period. Cells were counted in 3~4 islets per mouse (n=1 mouse).

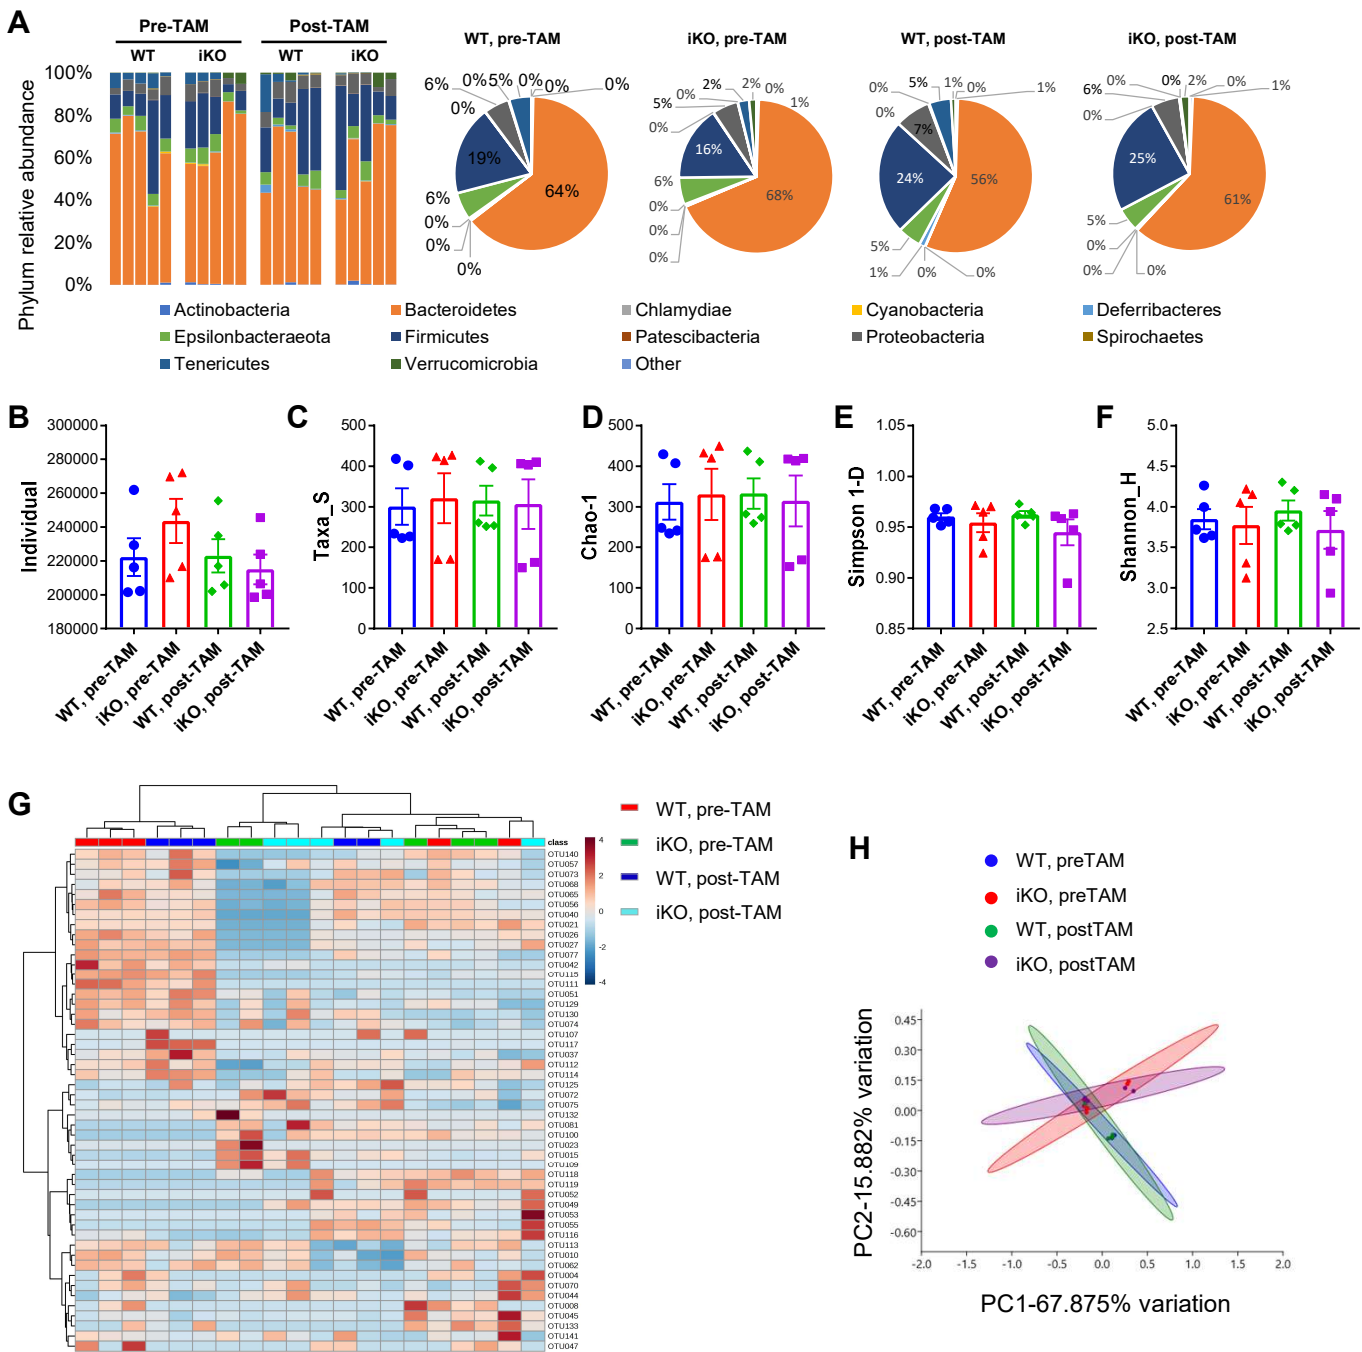

**Supplemental Figure S3. Microbiota analysis of inducible intestinal Gpr17 KO mice before and after tamoxifen injection. Related to Figure 5.** **A.** Stacked bar chart and pie chart showing the relative abundance of phyla in feces of chow-fed WT and iKO mice before and after tamoxifen injection (n=5 mice for each group). **B-F.** Sample richness (b, individual; c, Taxa\_S, detected richness; d, Chao-1, predicted richness) and alpha-diversity (e, Simpson 1-D; f, Shannon H) were not significantly changed. **G.** Heatmap showing the relationship of fecal samples from WT and iKO mice before and after tamoxifen injection. Top-50 differentially abundant OTUs (rows) and samples (columns) were arranged. **H.** Principal component analysis (PCA) of microbiota. Unpaired two-tailed Student's t-test were performed. Data are displayed as means  $\pm$  SEM.

**Table S1. List of primers and oligonucleotides. Related to STAR methods.**

| Primer for RT-qPCR                       | Oligo Sequence          |
|------------------------------------------|-------------------------|
| Human <i>GPR17</i> -F                    | GCCATAGTGCTGGCCATCTT    |
| Human <i>GPR17</i> -R                    | TACATGATGGGGTCGAGTGC    |
| Mouse <i>Gpr17</i> -F                    | GGAGCACCATCTAGAGCACCCCT |
| Mouse <i>Gpr17</i> -R                    | GGCTGCCTCCAGACCGTTCAT   |
| Mouse <i>Gcg</i> -F                      | GGCACATTCACCAGCGACTA    |
| Mouse <i>Gcg</i> -R                      | GTCCCTTCAGCATGCCTCTC    |
| Mouse <i>Gip</i> -F                      | AACTGTTGGCTAGGGGACAC    |
| Mouse <i>Gip</i> -R                      | GAAAGTCCCCTCTGCGTACC    |
| Mouse <i>Pyy</i> -F                      | CCTGCTCATCTTGCTTCGGA    |
| Mouse <i>Pyy</i> -R                      | ACTGGTCCAAACCTTCTGGC    |
| Human <i>RPLP0</i> -F                    | GGCAGCATCTACAACCCTGA    |
| Human <i>RPLP0</i> -R                    | CACAGACAAGGCCAGGACTC    |
| Mouse <i><math>\beta</math>-actin</i> -F | CAGCTTCTTTGCAGCTCCTT    |
| Mouse <i><math>\beta</math>-actin</i> -R | CACGATGGAGGGGAATACAG    |
